# Supplementary material for: Blood Cell Ratio Biomarkers of Non-type 2 Inflammation in Chronic Obstructive Pulmonary
Source: Research Square preprint supplement (doi:10.21203/rs.3.rs-8585567/v1), 2026-01-20

Blood Cell Ratio Biomarkers of Non-type 2 Inflammation in Chronic Obstructive Pulmonary Disease

Kaman So, Aabida Saferali, Jeong H. Yun, Min Hyung Ryu, Enrico Schiavi, Pater J. Castaldi, Lisa Ruvuna, Russell P. Bowler, Jeffrey L. Curtis, Craig P. Hersh

Online Supplement

Supplemental Table 1: Quartile cutoffs for ROC curve analysis of 2 or more exacerbations in the prior year

|  | Quartile | value | specificity | sensitivity | AUC |
| --- | --- | --- | --- | --- | --- |
| NLR, all subjects | 1st | 1.50 | 74.50 | 72.10 | 78.99 |
|  | median | 2.08 | 76.80 | 70.37 | 79.12 |
|  | 3rd | 2.87 | 69.14 | 78.52 | 79.33 |
| NLR, COPD only | 1st | 1.73 | 72.06 | 65.94 | 74.82 |
|  | median | 2.41 | 76.81 | 61.23 | 75.05 |
|  | 3rd | 3.33 | 78.68 | 58.70 | 75.06 |
| PLR, all subjects | 1st | 92.35 | 73.16 | 73.33 | 78.95 |
|  | median | 119.76 | 74.83 | 71.11 | 79.10 |
|  | 3rd | 154.78 | 75.32 | 70.62 | 79.05 |
| PLR, COPD only | 1st | 95.47 | 74.55 | 63.41 | 74.88 |
|  | median | 125.83 | 74.63 | 63.04 | 74.84 |
|  | 3rd | 164.31 | 68.23 | 70.29 | 74.99 |
| SII, all subjects | 1st | 331.10 | 76.20 | 70.12 | 79.02 |
|  | median | 479.50 | 67.86 | 78.52 | 79.28 |
|  | 3rd | 699.30 | 72.64 | 75.80 | 79.69 |
| SII, COPD only | 1st | 375.80 | 76.81 | 61.23 | 74.96 |
|  | median | 548.30 | 67.21 | 71.01 | 75.24 |
|  | 3rd | 822.20 | 66.28 | 70.65 | 75.56 |

Tables in separate excel files

Supplemental Tables 2-7: Differential expression of genes and proteins

Supplemental Tables 8-10: RNA-sequencing pathway analyses

Supplememtal Tables 11-13: Proteomics pathway analyses

Supplemental Figure 1. Receiver operating characteristic curves for frequent exacerbations outcome (2 or more in the prior year), limited to subjects with GOLD 2-4 COPD.


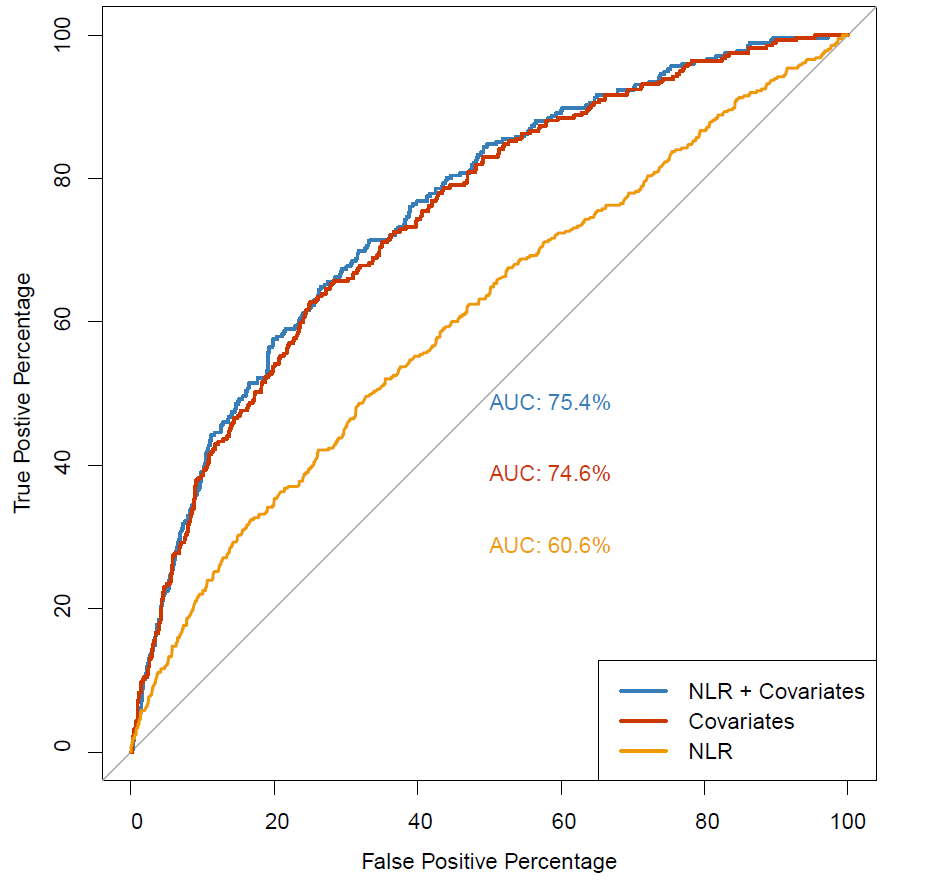

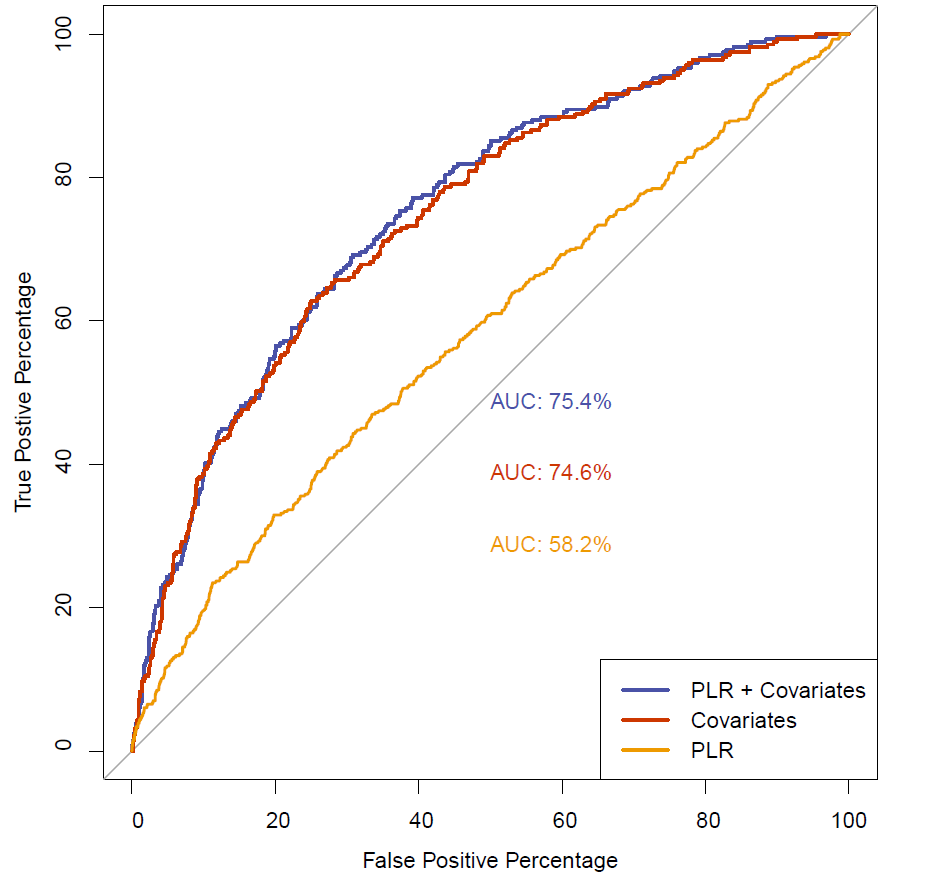

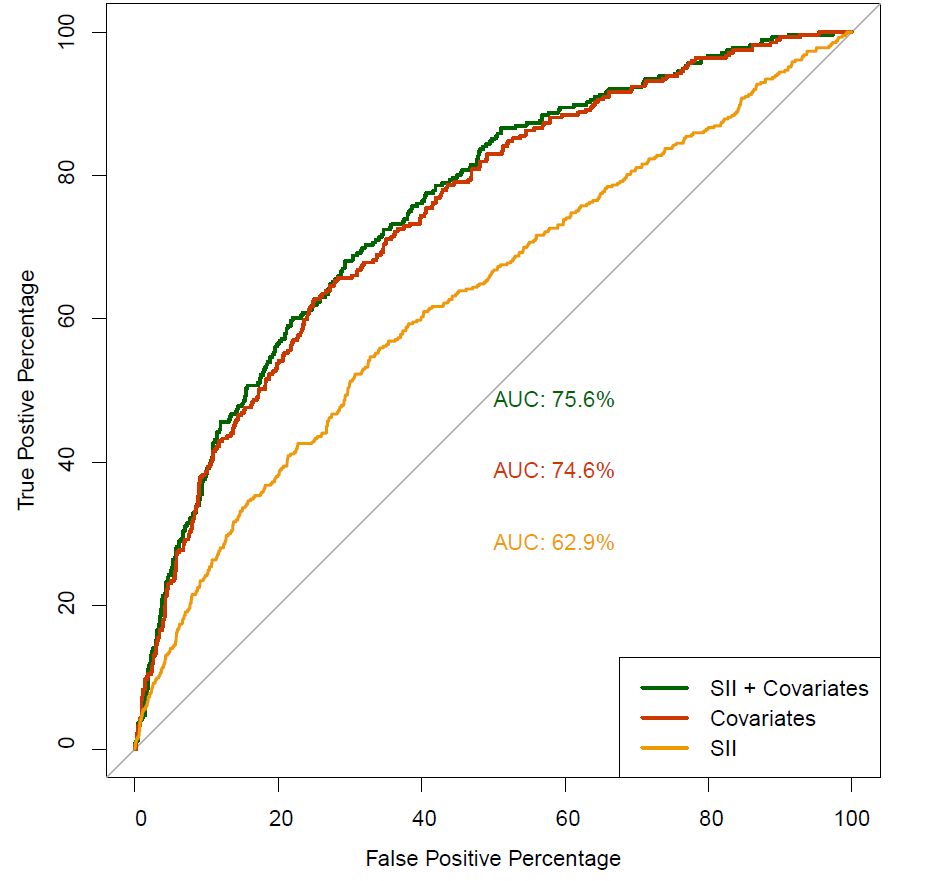

Supplement: Supplementary file 1 [file 132ed0a5853245cc5b142235.docx]
